# Supplementary material
Source: PubMed Central journal article supplement (PMC3541667)
Supplement: cr2012119x2.pdf [file cr2012119x2.pdf]

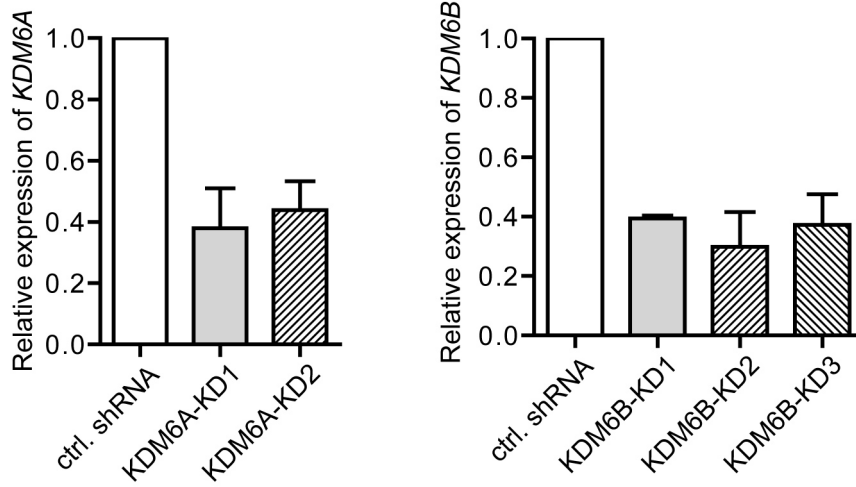

**Supplemental Figure S2:** RT-qPCR quantification of knockdown efficiency of the stable KDM6A (left) and KDM6B (right) knockdown HUES8 cell lines.
