# Supplementary material
Source: PubMed Central journal article supplement (PMC3541667)
Supplement: cr2012119x3.pdf [file cr2012119x3.pdf]

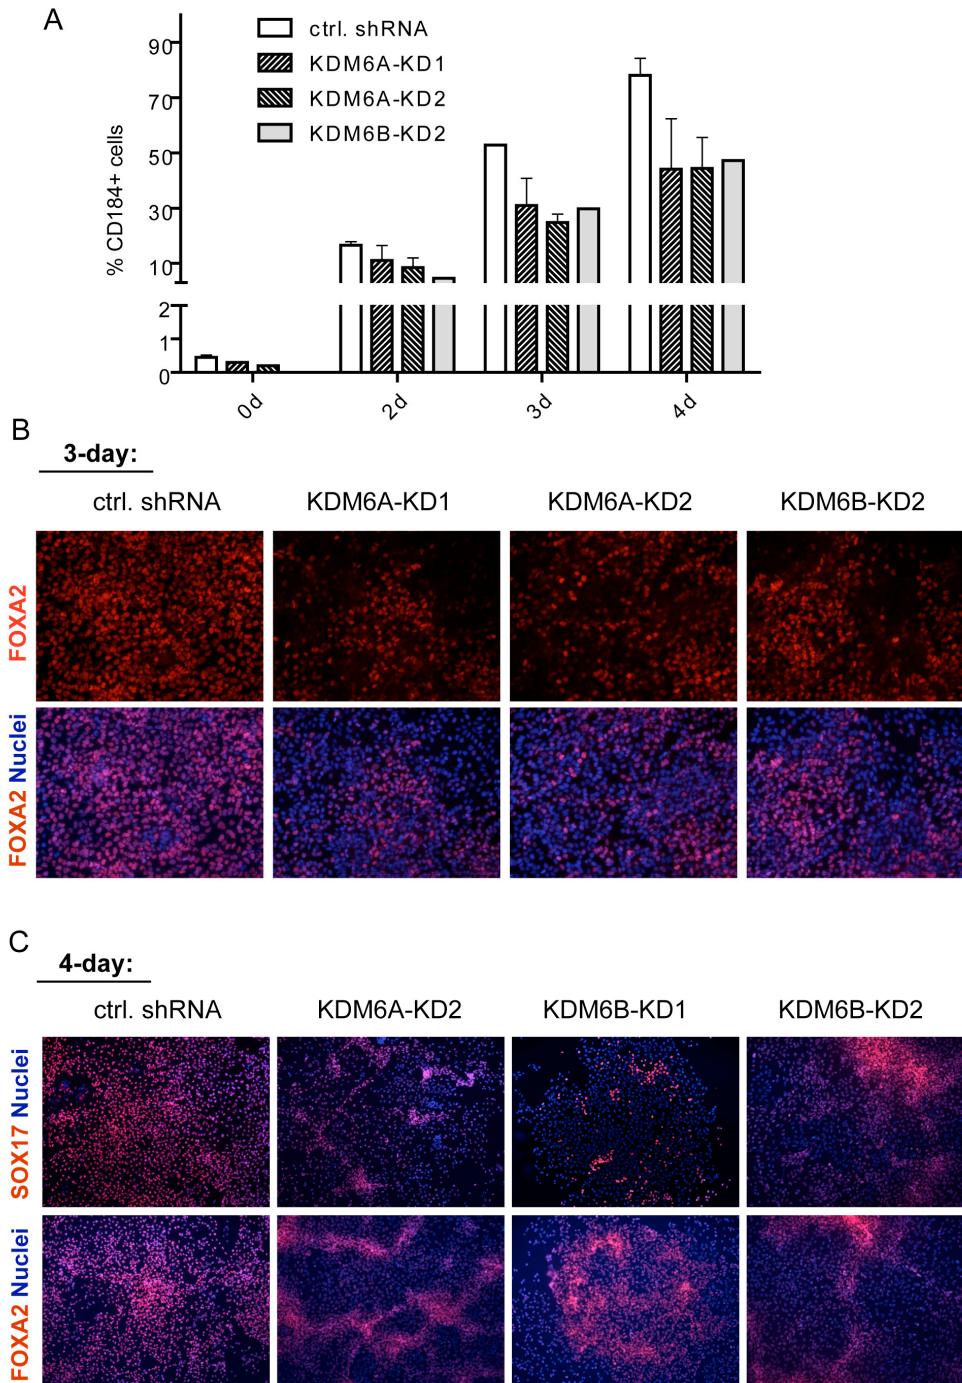

**Supplemental Figure S3:** KDM6A/KDM6B knockdown cells exhibit impaired endoderm differentiation during the entire differentiation process.

(A) FACS analysis of the endoderm differentiation efficiency in control and KDM6A or KDM6B knockdown ESCs at different day of differentiation.

(B-C) Immunofluorescence staining with endoderm markers (SOX17 and/or FOXA2) indicate the different knockdown cell lines all exhibit defects in endoderm differentiation at day 3 (B) and day 4 (C).
