# Supplementary material
Source: PubMed Central journal article supplement (PMC3541667)
Supplement: cr2012119x4.pdf [file cr2012119x4.pdf]

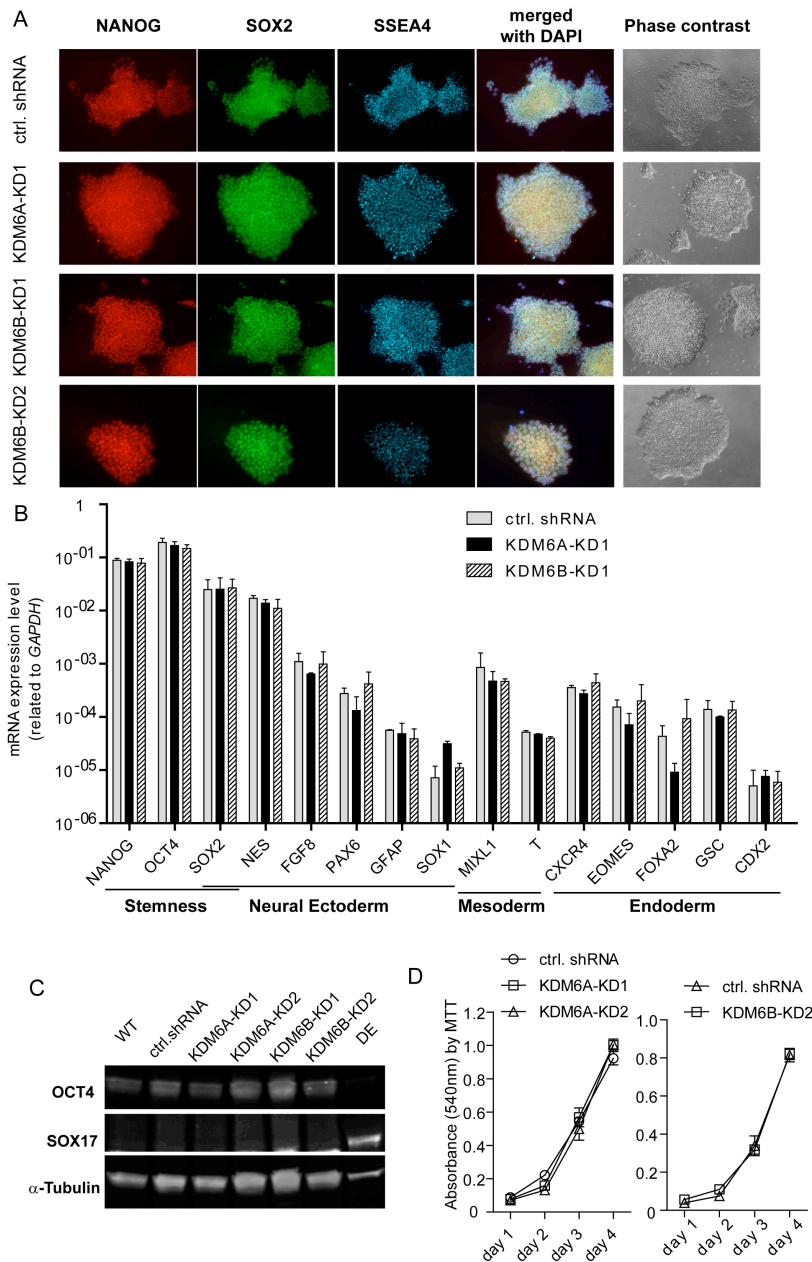

**Supplemental Figure S4: KDM6A or KDM6B knockdown does not affect ESC maintenance**

- (A) KDM6A or KDM6B knockdown does not affect expression of pluripotency genes or the ESC morphology.
- (B) RT-qPCR demonstrates that KDM6A or KDM6B knockdown does not affect expression of pluripotency genes or markers of the three germ lines.
- (C) Western blot analysis demonstrates that control and the various KDM6A or KDM6B knockdown ESCs have similar OCT4 levels, but no detectable SOX17 expression.
- (D) KDM6A or KDM6B knockdown does not affect cell proliferation.
