# Supplementary material
Source: PubMed Central journal article supplement (PMC3541667)
Supplement: cr2012119x5.pdf [file cr2012119x5.pdf]

**KEGG\_Pathway**

| Term                                             | Count     | p-Value         | Genes                                                                                                                                                                                                                |
|--------------------------------------------------|-----------|-----------------|----------------------------------------------------------------------------------------------------------------------------------------------------------------------------------------------------------------------|
| hsa04080:Neuroactive ligand-receptor interaction | 60        | 4.48E-12        |                                                                                                                                                                                                                      |
| hsa04020:Calcium signaling pathway               | 47        | 1.28E-11        |                                                                                                                                                                                                                      |
| hsa04340:Hedgehog signaling pathway              | 23        | 8.56E-10        |                                                                                                                                                                                                                      |
| hsa05217:Basal cell carcinoma                    | 22        | 3.86E-09        |                                                                                                                                                                                                                      |
| hsa05200:Pathways in cancer                      | 63        | 7.48E-09        |                                                                                                                                                                                                                      |
| hsa04916:Melanogenesis                           | 25        | 5.20E-06        |                                                                                                                                                                                                                      |
| <b>hsa04310:Wnt signaling pathway</b>            | <b>30</b> | <b>6.86E-05</b> | <b>WNT5A, CER1, WNT16, NKD1, WNT5B, APC2, WNT3A, PPP2R5C, WNT2, WNT1, WNT3, FRAT1, CAMK2B, WNT6, NFATC1, WNT10A, WNT10B, FZD1, LEF1, FZD2, WNT2B, SFRP5, DKK2, FZD10, DKK1, PRICKLE1, SFRP4, WNT9B, WNT11, WNT7A</b> |
| hsa04950:Maturity onset diabetes of the young    | 10        | 2.12E-04        |                                                                                                                                                                                                                      |
| hsa05414:Dilated cardiomyopathy                  | 19        | 0.001305        |                                                                                                                                                                                                                      |

**Supplemental Figure S5:** DAVID-KEGG (<http://david.abcc.ncifcrf.gov>) signaling pathway analysis with the overlapped H3K27me3-marked genes in human ESCs from two independent reports (Pan et al. 2007; Zhao et al. 2007). Only the pathways with  $p < 0.001$  are listed. Genes of the WNT signaling pathway with H3K27me3 enrichment in human ESCs are listed.

**Supplemental References**

Pan G, Tian S, Nie J, Yang C, Ruotti V, Wei H, Jonsdottir GA, Stewart R, Thomson JA. 2007. Whole-genome analysis of histone H3 lysine 4 and lysine 27 methylation in human embryonic stem cells. *Cell stem cell* 1: 299-312.

Zhao XD, Han X, Chew JL, Liu J, Chiu KP, Choo A, Orlov YL, Sung WK, Shahab A, Kuznetsov VA *et al.* 2007. Whole-genome mapping of histone H3 Lys4 and 27 trimethylations reveals distinct genomic compartments in human embryonic stem cells. *Cell stem cell* 1: 286-298.
