# Supplementary material
Source: PubMed Central journal article supplement (PMC3541667)
Supplement: cr2012119x6.pdf [file cr2012119x6.pdf]

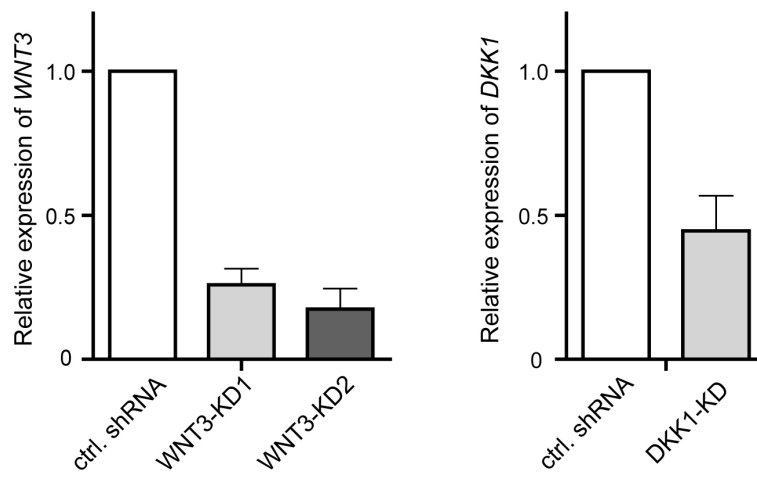

**Supplemental Figure S6:** RT-qPCR quantification of knockdown efficiency of the stable *WNT3* (left) and *DKK1* (right) knockdown HUES8 cell lines.
