# Supplementary material
Source: PubMed Central journal article supplement (PMC3541667)
Supplement: cr2012119x7.pdf [file cr2012119x7.pdf]

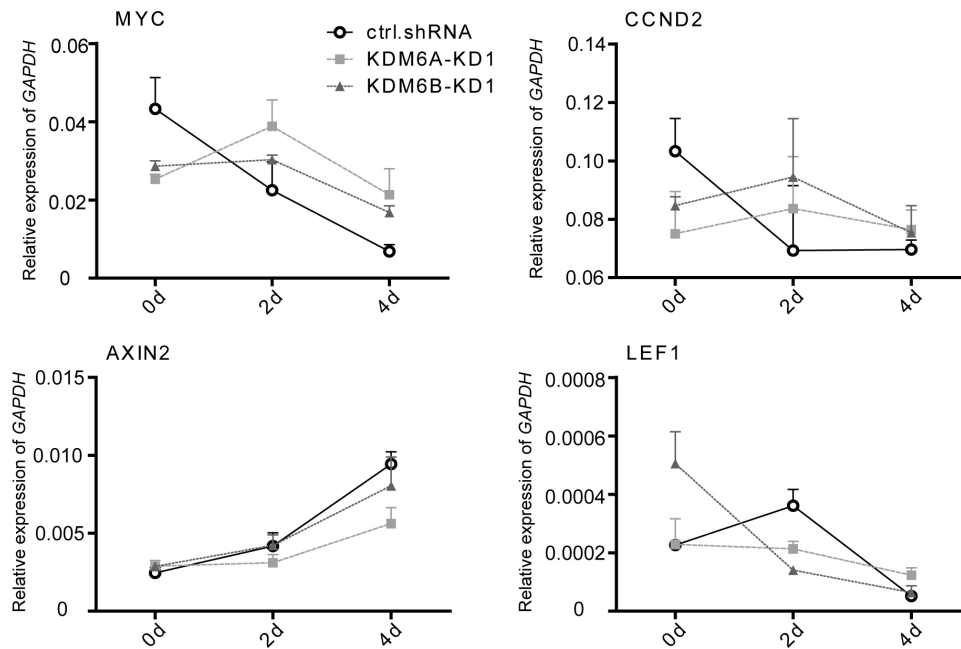

**Supplemental Figure S7:** KDM6A/KDM6B knockdown alters WNT target gene expression under definitive endoderm differentiation conditions. The expression levels of four genes of WNT signaling pathway *MYC*, *CCND2* (also *CYCLIN D2*), *AXIN2* and *LEF1* were analyzed by RT-qPCR at different days during endoderm differentiation.
