# Supplementary material
Source: PubMed Central journal article supplement (PMC3541667)
Supplement: cr2012119x8.pdf [file cr2012119x8.pdf]

**Supplemental Table S1: Primers for quantitative expression analysis of RT-PCR.**

| <b>Genes</b>  | <b>Forward</b>           | <b>Reverse</b>          | <b>Product/bp</b> |
|---------------|--------------------------|-------------------------|-------------------|
| <i>GAPDH</i>  | AATGAAGGGGTCATTGATGG     | AAGGTGAAGGTCGGAGTCAA    | 108               |
| <i>KDM6A</i>  | TACAGGCTCAGTTGTGTAACCT   | CTGCGGGAATTGGTAGGCTC    | 99                |
| <i>KDM6B</i>  | GGAGGCCACACGCTGCTAC      | GCCAGTATGAAAGTCCAGAGCTG | 112               |
| <i>EZH1</i>   | GTCACTGAACACAGTTGCATTG   | TGCACAAAACCGTCTCATCTTC  | 92                |
| <i>EZH2</i>   | AATCTGAGAAGGGACCAGTTTGT  | ATCAGCTCGTCTGAACCTCTT   | 89                |
| <i>FOXA2</i>  | GGAGCAGCTACTATGCAGAGC    | CGTGTTTCATGCCGTTTCATCC  | 83                |
| <i>GATA6</i>  | ACTTGAGCTCGCTGTTCTCG     | CAGCAAAAATACTTCCCCCA    | 107               |
| <i>GSC</i>    | AGGAGAAAGTGGAGGTCTGGTTTA | GACGTCTTGTTCCTACTTCTCCG | 106               |
| <i>NCAD</i>   | GAGGAGTCAGTGAAGGAGTCA    | GGCAAGTTGATTGGAGGGATG   | 122               |
| <i>SOX17</i>  | GCATGACTCCGGTGTGAATCT    | TCACACGTCAGGATAGTTGCAGT | 103               |
| <i>NANOG</i>  | CCCCAGCCTTTACTCTTCTTA    | CCAGGTTGAATTGTTCCAGGTC  | 97                |
| <i>OCT4</i>   | CAAAGCAGAAACCCTCGTGC     | TCTCACTCGGTTCTCGATACTG  | 64                |
| <i>SOX2</i>   | GTCATTTGCTGTGGGTGATG     | AGAAAAACGAGGGAAATGGG    | 120               |
| <i>NES</i>    | GAGGGAAGTCTTGGAGCCAC     | AAGATGTCCCTCAGCCTG      | 99                |
| <i>FGF8</i>   | CTCTGCTTCCAAAGGTGTCC     | CAGGTCTTGCCCAACAAG      | 94                |
| <i>PAX6</i>   | TCCGTTGGAAGTATGAGT       | GTTGGTATCCGGGGACTTC     | 101               |
| <i>GFAP</i>   | CACCACGATGTTCTCTTGA      | GTGCAGACCTTCTCCAACCT    | 90                |
| <i>SOX1</i>   | ATTATTTTGCCCGTTTTCCC     | TCAAGGAAACACAATCGCTG    | 108               |
| <i>MIXL1</i>  | GAGACTTGGCACGCTGT        | GGTACCCCGACATCCACTT     | 99                |
| <i>T</i>      | GATGATCGTGACCAAGAACGG    | CCACGAAGTCCAGCAGGAA     | 105               |
| <i>CXCR4</i>  | TACACCGAGGAAATGGGCTCA    | AGATGATGGAGTAGATGGTGGG  | 112               |
| <i>EOMES</i>  | CACATTGTAGTGGGCAGTGG     | CGCCACCAAAGTATGATGAT    | 102               |
| <i>CDX2</i>   | CTGGAGCTGGAGAAGGAGTTTC   | ATTTAACCTGCCTCTCAGAGAGC | 101               |
| <i>WNT3</i>   | AGTTGCTTGGGGACCAGG       | CTCGCTGGCTACCCAATTT     | 110               |
| <i>DKK1</i>   | TTCCATTTTTGCAGTAATTCCC   | AGTACTGCGCTAGTCCCACC    | 126               |
| <i>WNT1</i>   | GGAGGAGGCTACGTTCACAA     | TTTCTGCTACGCTGCTGCT     | 98                |
| <i>WNT3A</i>  | CTTCTGCACATGAGCGTGTC     | AACTGCACCACCGTCCAC      | 133               |
| <i>WNT5A</i>  | GCATCCCAGCTCTGCCCCAAC    | GCGCAGTGAACCGGAGCTGAA   | 74                |
| <i>WNT7A</i>  | CAGCTTCATGTTCTCCTCCAG    | AAGGTCTTTGTGGATGCC      | 105               |
| <i>WNT10B</i> | GGAAAAAGCACTTTCTCGGA     | GGTCCACGAGTGTGAGCAC     | 124               |
| <i>WNT11</i>  | ACCTGTGCAGACACCAGACC     | CGTGTGCTATGGCATCAAGT    | 108               |
| <i>DKK2</i>   | TGGCAATACCTCCCAACTTC     | GTACCAAGGACTGGCATTTCG   | 102               |
| <i>SFRP5</i>  | CTTCCGGTCCCCATTCTCTA     | CCAGTGTGAGATGGAGCACA    | 112               |
| <i>MYC</i>    | TCCCTCCACTCGGAAGGAC      | CTGGTGCATTTTCGGTTGTTG   | 96                |
| <i>CCND2</i>  | ACGGTACTGCTGCAGGCTAT     | AGCTGCTGGCTAAGATCACC    | 98                |
| <i>LEF-1</i>  | TCCTGGAGAAAAGTGCTCGT     | TGGATCTCTTTCTCCACCCA    | 121               |
| <i>AXIN2</i>  | CTGGTGCAAAGACATAGCCA     | AGTGTGAGGTCCACGGAAAC    | 103               |
