# Supplementary material
Source: PubMed Central journal article supplement (PMC3541667)
Supplement: cr2012119x9.pdf [file cr2012119x9.pdf]

**Supplemental Table S2: Genomic primers for ChIP-qPCR.**

| <b>locus</b> | <b>Forward</b>       | <b>Reverse</b>           | <b>Product/bp</b> |
|--------------|----------------------|--------------------------|-------------------|
| DKK1-1       | TGGGCTGGCCATCTCCACCG | ACTCCCCAGTACAAACAGAGGGCA | 73                |
| DKK1-2       | GGCACGTTGGACCCTGTCCG | GGGCAATCGCGGCGGTAGAT     | 87                |
| WNT3-1       | GCGTTCACATGGCGAGGGCT | CACGTCCCAACGGGTCACGG     | 80                |
| WNT3-2       | CGGAGCAGCCGGGTTTGAGG | GGGCGCGTGATTGACAGGCT     | 99                |
