# Supplementary material
Source: PubMed Central journal article supplement (PMC3541667)
Supplement: cr2012119x10.pdf [file cr2012119x10.pdf]

## **Supplementary information, Data S1 Methods**

### **Human ESC Culture**

Human ESC lines HUES8 (passage 40-60) and H9 (passage 35-50) were used in this study. Routinely, H9 was cultured on mitomycin C-inactivated mouse embryonic fibroblasts (MEFs) in human ESC medium (DMEM/F12, 20% (vol/vol) Knockout Serum Replacement, 1% (vol/vol) non-essential amino acids, 1% (vol/vol) GlutaMax, 1% (vol/vol) penicillin-streptomycin, 55  $\mu$ M  $\beta$ -mercaptoethanol supplemented with 8 ng/ml FGF2 (PeproTech)), whereas HUES8 was cultured in Matrigel-coated dishes with mTeSR1 medium according to the manual (STEMCELL Technologies). All cell culture media and supplements in this study were purchased from Gibco/Invitrogen, unless specifically stated.

### **Immunofluorescence staining**

Culturing cells in chambered slides (Millipore) were fixed by 4% PFA for 15 minutes and blocked with 10% (vol/vol) donkey serum plus 0.2% Triton X-100 in PBS for 2 hours. Then samples were incubated at 4 °C for overnight with primary antibody or irrelevant IgG and then incubated at room temperature for 1 hour with appropriate secondary antibody (donkey anti-mouse IgG Tric or donkey anti-goat IgG Alexa-488 or donkey anti-rabbit Tric) in blocking buffer. Cells were counterstained with 4'-6-diamidino-2-phenylindole (DAPI) for 5 min before mounting with Vectorshield (Vector Laboratories). The used primary antibodies and dilutions were listed as follows: Goat anti-human FOXA2 (R&D, 1:500), Goat anti-human SOX17 (R&D, 1:500), Goat anti-human NANOG (R&D, 1:400), Rabbit anti-SOX2 (Millipore, 1:400), Mouse anti-human SSEA4 (Millipore, 1:200).

### **Cell Proliferation Assays**

For MTT assay, the same amount cells (2000-5000 cells) were seeded in each well of Matrigel-coated 96-well plate with mTeSR1 medium and assayed at different day. Before the assay, cells were washed with PBS and then cultured with 100  $\mu$ l Pheno Red-free medium. 10  $\mu$ l of MTT (3-(4,5-dimethylthiazolyl-2)-2,5-diphenyltetrazolium bromide, 5 mg/ml, Invitrogen) solution was added to each well containing cells and incubated for four hours at 37C. After the removal of medium, 50  $\mu$ l of dimethyl sulfoxide (DMSO) was added to dissolve the particles and absorbance was measured at 540 nm using spectrophotometer FLUOstar Omega (BMG Labtech).

### **Data analysis**

All data are representative of three or more experiments. Errors are standard error values of averaged results. A two-sided Student's t-test was performed and values of  $p < 0.05$  were taken as a significant difference between means.
